# Supplementary material for: Gene Expression Changes in Cytokine and Chemokine Receptors in Association with Melanoma Liver Metastasis
Source: MDPI journal article supplement (doi:10.3390/ijms24108901), 2023-05-17
Supplement: s1 [file s1]

**Supplementary Table S1. Results of *in vitro* invasion assays**

|                         | WM983A | WM278 | WM3248 | WM793B | WM1361 | WM1366 |
|-------------------------|--------|-------|--------|--------|--------|--------|
| Control <sup>a</sup> 1  | 4.3    | 321   | 1.0    | 312    | 12.7   | 384    |
| Control 2               | 7.9    | 314   | 8.5    | 301    | 18.8   | 365    |
| Control 3               | 5      | 99    | 1.3    | 320    | 36     | 372    |
| HHSEC-CM <sup>b</sup> 1 | 9.4    | 301   | 7.3    | 314    | 20.8   | 352    |
| HHSEC-CM 2              | 11.3   | 325   | 27.0   | 305    | 35.1   | 368    |
| HHSEC-CM 3              | 9.1    | 114   | 6.9    | 339    | 63     | 367    |
| Ratio <sup>c</sup> 1    | 2.2    | 0.9   | 7.3    | 1.0    | 1.6    | 0.9    |
| Ratio 2                 | 1.4    | 1.0   | 3.2    | 1.0    | 1.9    | 1.0    |
| Ratio 3                 | 1.8    | 1.2   | 5.3    | 1.1    | 1.8    | 1.0    |
| Mean ratio              | 1.8    | 1.0   | 5.3    | 1.0    | 1.8    | 1.0    |
| S.D. ratio              | 0.4    | 0.1   | 2.1    | 0.0    | 0.1    | 0.0    |

<sup>a</sup>Average number of invaded cells with 10% FBS as chemoattractant, <sup>b</sup>Average number of invaded cell with HHSEC conditioned medium (50%) as chemoattractant. <sup>c</sup>Ratio of the HHSEC-CM and Control results, numbers indicate the same experiments.
