# Supplementary material for: Gene Expression Changes in Cytokine and Chemokine Receptors in Association with Melanoma Liver Metastasis
Source: MDPI journal article supplement (doi:10.3390/ijms24108901), 2023-05-17
Supplement: s1 [file s1]

**Supplementary Table S2. Correlation between the relative gene expression of cytokine- and chemokine receptors and the invasive potential in melanoma cells after culturing with HHSEC-CM.**

| Gene symbol | Correlation Coefficient | Sig. (2-tailed) |
|-------------|-------------------------|-----------------|
| CCR1        | .899*                   | 0.015           |
| CXC3CR1     | .896*                   | 0.016           |
| CXCR2       | .870*                   | 0.024           |
| CXCR5       | .877*                   | 0.022           |
| IL1RAPL2    | .963**                  | 0.002           |
| IL1RN       | .928**                  | 0.008           |
| IL6ST       | .919**                  | 0.010           |
| IL15RA      | .933**                  | 0.007           |
| IL17RB      | .967**                  | 0.002           |
| IL17RC      | .872*                   | 0.024           |
| IL17RD      | .938**                  | 0.006           |
| TNFRSF10B   | .918**                  | 0.010           |
| TNFRSF18    | .925**                  | 0.008           |

\* Correlation is significant at the 0.05 level (2-tailed).

\*\* Correlation is significant at the 0.01 level (2-tailed).
