# Supplementary material for: Gene Expression Changes in Cytokine and Chemokine Receptors in Association with Melanoma Liver Metastasis
Source: Int J Mol Sci. 2023 May 17;24(10):8901. doi: 10.3390/ijms24108901 (PMC10219520; doi:10.3390/ijms24108901)
Supplement: Supplementary file 1 [file ijms-24-08901-s001.zip]

Archive with 4 entries (4 files):
- Koroknai_etal_Supplementary Table S1.pdf
- Koroknai_etal_Supplementary Table S2.xlsx
- Koroknai_etal_Supplementary Table S3.pdf
- Supplementary Figure S1_NEW.jpg
